# Supplementary material for: Raman spectroscopy as a potential tool for label free therapeutic drug monitoring in human serum: the case of busulfan and methotrexate
Source: Royal Society of Chemistry journal article supplement (doi:10.1039/c9an00801b), 2019-01-01
Supplement: c9an00801b1.pdf [file c9an00801b1.pdf]

## Raman spectroscopy as a potential tool for label free therapeutic drug monitoring from human serum: the case of Busulfan and Methotrexate

Drishya Rajan Parachalil<sup>a,b\*</sup>, Franck Bonnier<sup>c</sup>, Deirdre Commerford<sup>b</sup>, Igor Chourpa<sup>c</sup>, Jennifer McIntyre<sup>a</sup>, and Hugh J. Byrne<sup>a</sup>

<sup>a</sup>FOCAS Research Institute, Technological University of Dublin, Kevin Street, Dublin 8, Ireland

<sup>c</sup>Université de Tours, Faculty of Pharmacy, EA 6295 Nanomédicaments et Nanosondes, 31 avenue Monge, 37200 Tours, France.

<sup>b</sup>School of Physics and Optometric & Clinical Sciences, Technological University of Dublin, Kevin Street, Dublin 8, Ireland

\*Corresponding Author: [drishyarajan.parachalil@mydit.ie](mailto:drishyarajan.parachalil@mydit.ie)

### 1. EMSC corrected dataset of Busulfan and Methotrexate

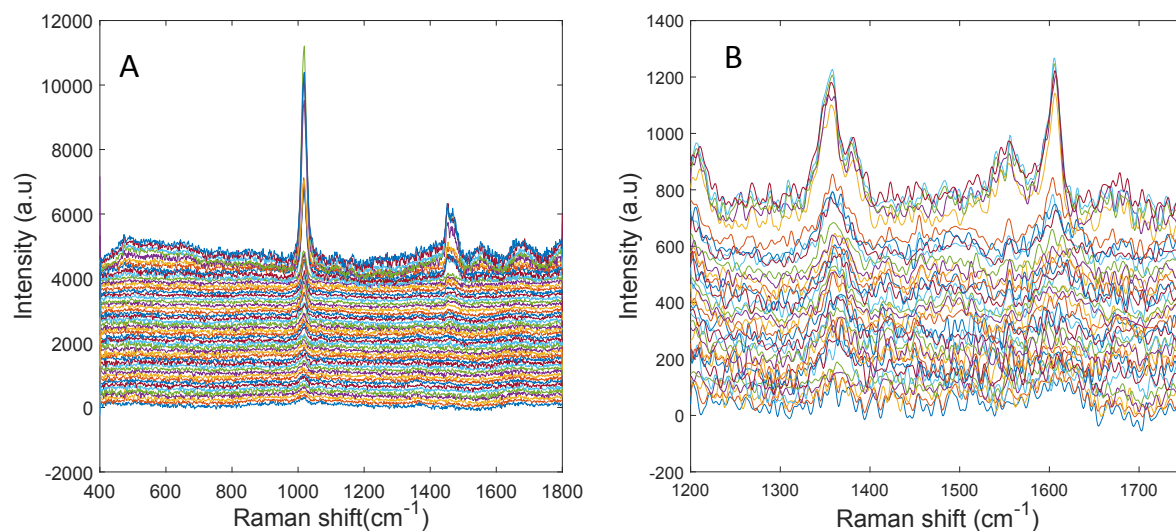

**Figure S1:** EMSC corrected and smoothed dataset of **A** Busulfan from 0mg/mL to 0.05mg/mL in the fingerprint region. **B:** Methotrexate from 0 $\mu$ M to 500 $\mu$ M from 1200 $\text{cm}^{-1}$  to 1800 $\text{cm}^{-1}$ . The spectra are offset for clarity.

## 2. EMSC corrected data of Busulfan and Methotrexate at the LOD

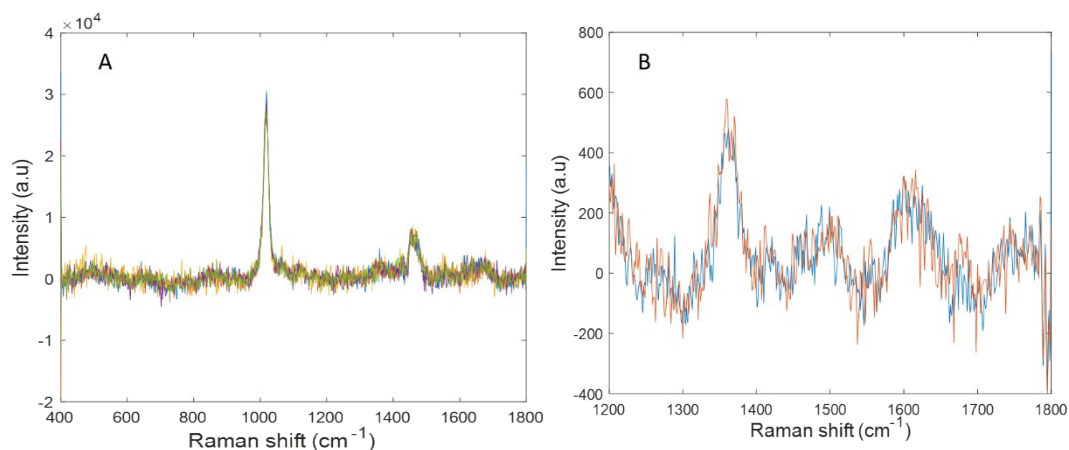

**Figure S2:** EMSC corrected and smoothed dataset of **A** Busulfan at 0.0002mg/mL in the fingerprint region. **B:** Methotrexate at 10μM from 1200cm<sup>-1</sup> to 1800cm<sup>-1</sup>. The spectra are offset for clarity.

## 3. Root Mean Square Error Cross Validation (RMSECV) plots for Busulfan and Methotrexate

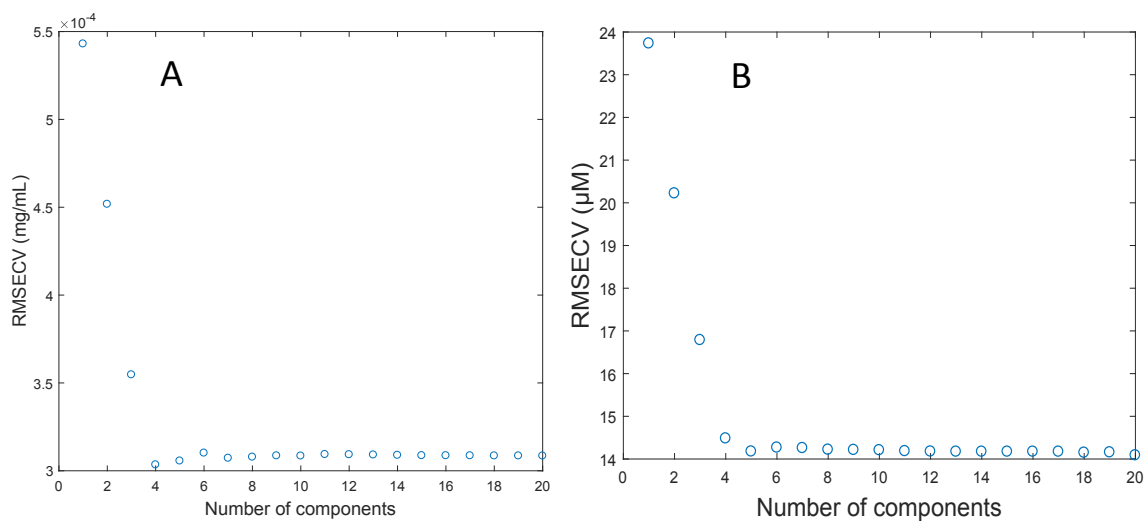

**Figure S3.** Evolution of RMSECV for **(A)** Busulfan and **(B)** Methotrexate. The RMSECV values are calculated to be 0.0003mg/mL for Bu and 4.02μM for MTX
